# Supplementary material for: Hydrothermal syntheses, crystal structures and magnetic properties of two new mixed metal copper(i) sulfites
Source: Royal Society of Chemistry journal article supplement (doi:10.1039/b916465k), 2009-11-02
Supplement: b916465k.pdf [file b916465k.pdf]

# Hydrothermal syntheses, crystal structures and magnetic properties of two new mixed metal copper(I) sulfites

Pei-Xin Li,<sup>a,b</sup> and Jiang-Gao Mao<sup>a\*</sup>

## Supporting Materials

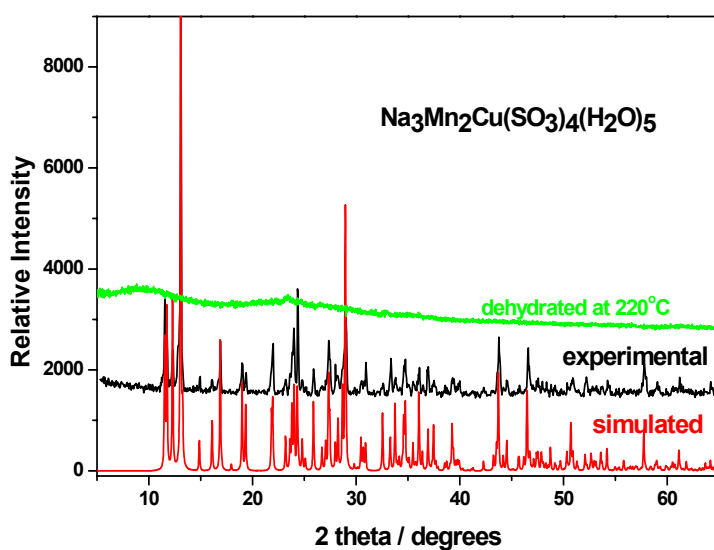

(a)

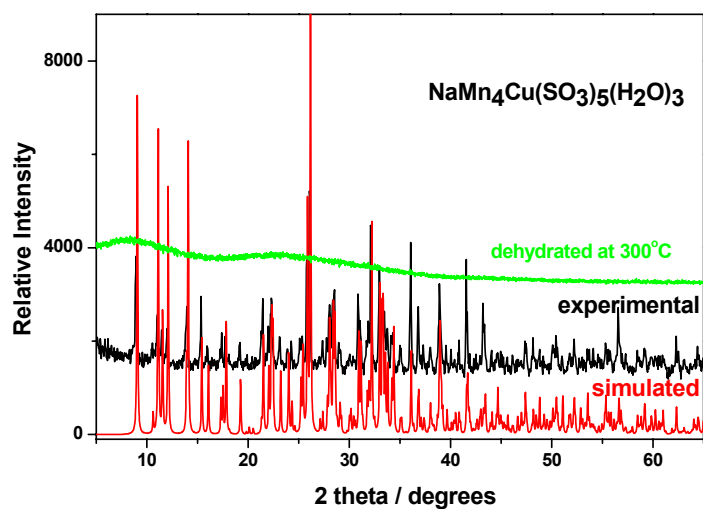

(b)

Figure S1. Simulated and experimental XRD powder patterns for compounds 1 (a) and 2 (b).

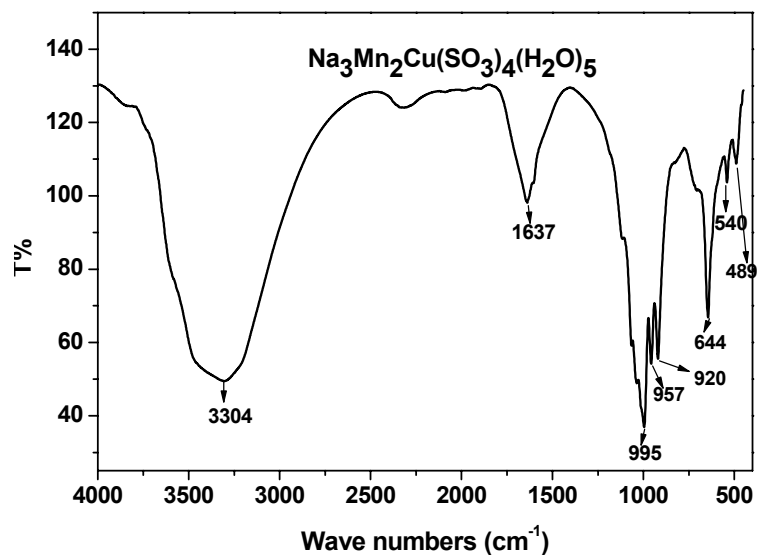

(a)

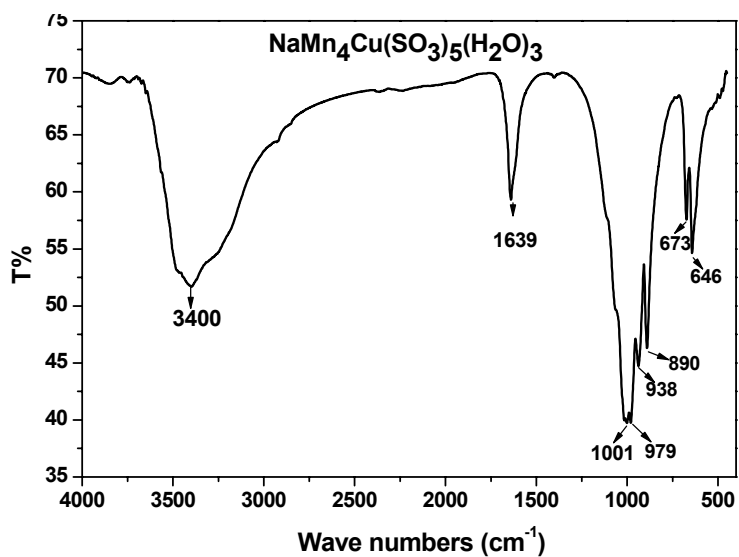

(b)

Figure S2. IR Spectra of compounds **1** (a) and **2** (b)
